# Supplementary material for: Synergistic effects of the zinc acetate additive on the performance enhancement of Sn-based perovskite solar cells
Source: Royal Society of Chemistry journal article supplement (doi:10.1039/d0qm01036g), 2021-01-01
Supplement: d0qm01036g1.pdf [file d0qm01036g1.pdf]

## Supporting information

### **Synergistic effects of zinc acetate additive on the performance enhancement of Sn-based perovskite solar cells**

Guanqi Tang, <sup>†a</sup> Sihua Li, <sup>†a</sup> Jiupeng Cao,<sup>a</sup> Tianyue Wang,<sup>a</sup> Peng You,<sup>a</sup>

Qidong Tai,<sup>a</sup> and Feng Yan<sup>\*a</sup>

<sup>a</sup> Department of Applied Physics, The Hong Kong Polytechnic University, Hong Kong, P. R. China

Corresponding email: [apafyan@polyu.edu.hk](mailto:apafyan@polyu.edu.hk)

<sup>†</sup> These authors contributed equally to this work.

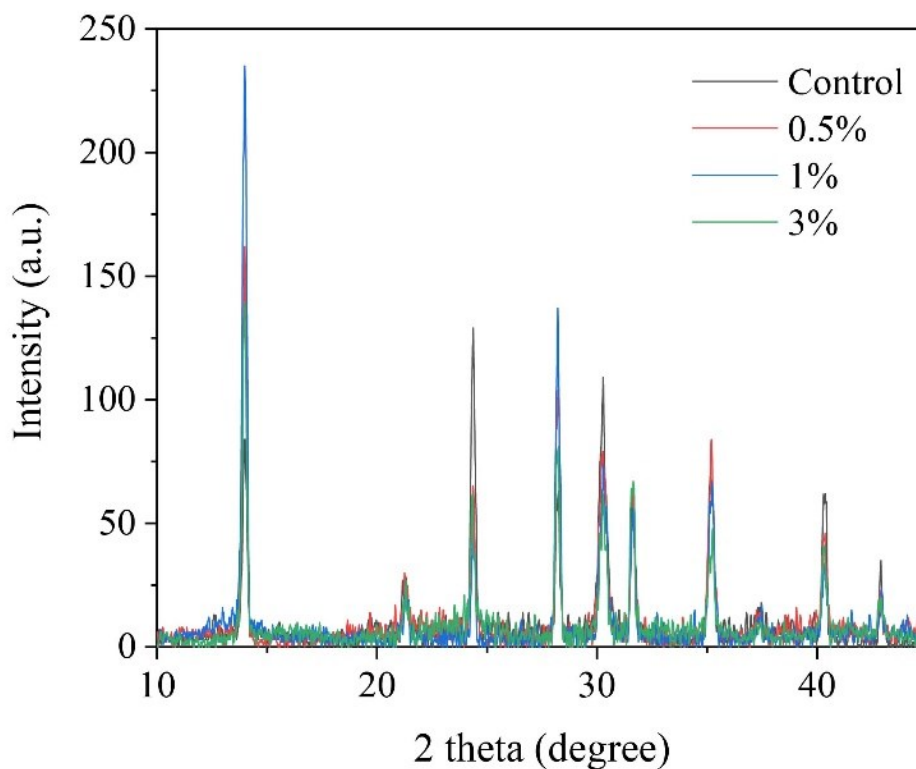

Figure S1. The XRD patterns of Sn perovskite films without and with different amount of  $\text{ZnAc}_2$ .

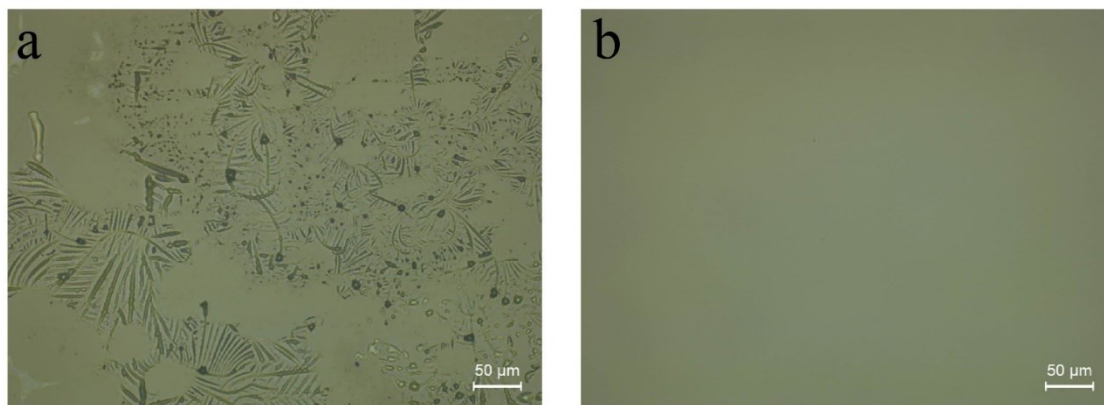

Figure S2. Photographs of  $\text{SnCl}_2$  a) and  $\text{SnCl}_2$ - $\text{ZnAc}_2$  complex b) films, respectively.

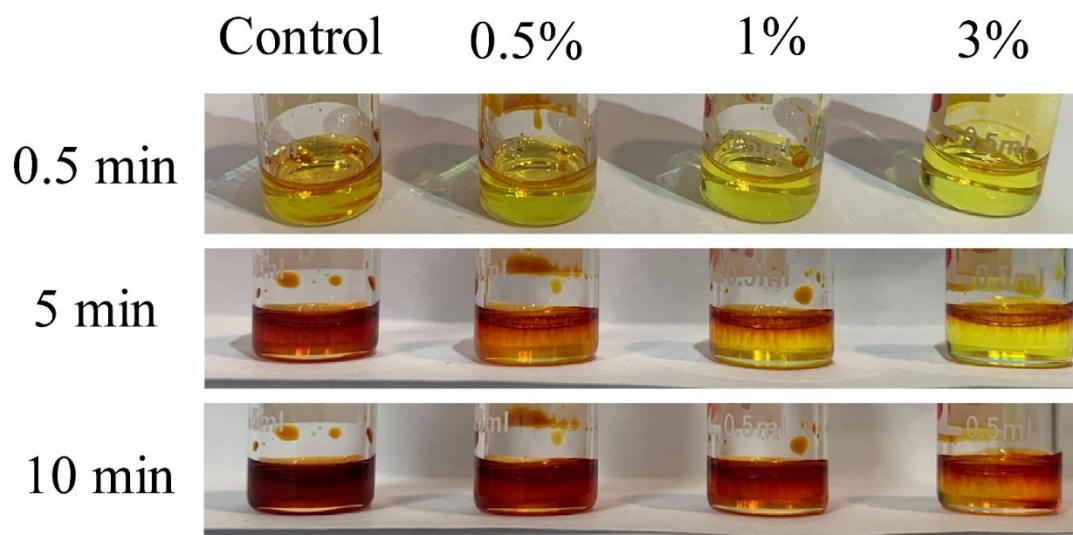

Figure S3. The photos of color changes of Sn perovskite solutions with different amount of  $\text{ZnAc}_2$  being exposed to air for different periods of time.

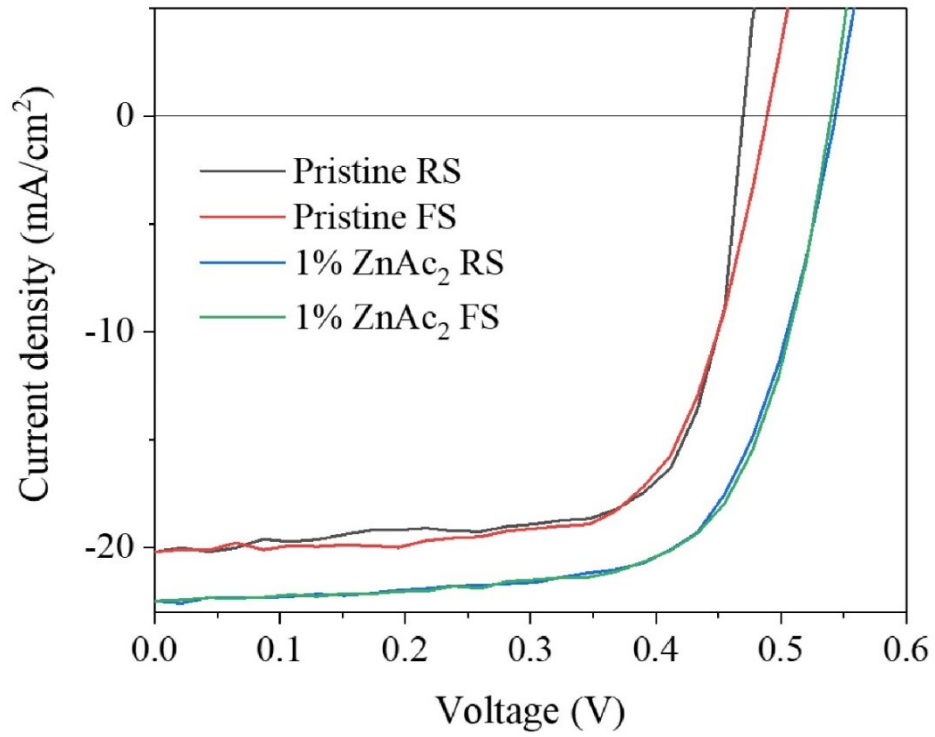

Figure S4. The J-V curves of champion devices in forward and reverse scan.
